# Supplementary material
Source: Springer Nature journal article supplement (https://www.springermedizin.de/resource/supplementary/12889_2012_4248_MOESM3_ESM.pdf/9491400)

# Histogram of TBSA

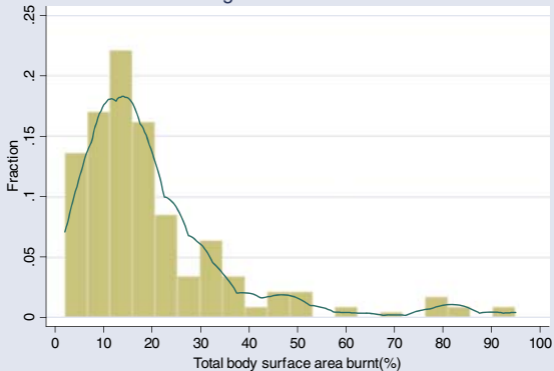

Supplement: MOESM3 [file 9491400]
